# Supplementary material
Source: PubMed Central journal article supplement (PMC2275073)
Supplement: bj4070343add1.pdf [file bj4070343add1.pdf]

**Supplementary Movie 1. Rotatable surface projections of plasmepsin-GFP transfected parasite.**

A series of confocal images was generated from a single infected RBC and reconstructed to form a 3-dimensional representation. The spatial animation reveals the cytosomal vesicles as independent structures in the parasite cytoplasm.
